# Supplementary material
Source: publisher figshare collection journal article supplement (https://gsajournals.figshare.com/ndownloader/files/19936757)
Supplement: Supplementary file 1 [file 19936757]

## Sheet: Table S2
Table S2 Other 5' HoxA and HoxD genes of mammals analyzed in this study
Species name	Order	GenBank accession number
		Hoxa9	Hoxa10	Hoxa11	Hoxa13	Hoxd9	Hoxd10	Hoxd12	Hoxd13
Balaenoptera acutorostrata	Cetartiodactyla	XM_007171523						XM_007190425	FJ455477
Balaenoptera physalus	Cetartiodactyla								FJ455476
Megaptera novaeangliae	Cetartiodactyla								FJ455475
Physeter catodon	Cetartiodactyla	XM_007112773	XM_024128988	XM_007112772	XM_024131939	XM_007112002	XM_007112001	XM_007112000	FJ455478
Kogia breviceps	Cetartiodactyla								FJ455479
Delphinapterus leucas	Cetartiodactyla	XM_022584533	XM_022584525	XM_022589894	XM_022589881	XM_022570087		XM_022570198	XM_022570197
Ziphius cavirostris	Cetartiodactyla								FJ455480
Mesoplodon densirostris	Cetartiodactyla								FJ455481
Monodon monoceros	Cetartiodactyla	XM_029233661	XM_029233660	XM_029232909		XM_029224663	XM_029224658	XM_029225730	XM_029225669
Phocoena phocoena	Cetartiodactyla								FJ455484
Neophocaena asiaeorientalis	Cetartiodactyla	XM_024754992	XM_024754988	XM_024754991			XM_024732908	XM_024732888
Orcinus orca	Cetartiodactyla	XM_004265666	XM_004265665	XM_004265667		XM_004267346		XM_004267343	XM_004267342
Lagenorhynchus obliquidens	Cetartiodactyla	XM_027102327	XM_027102325	XM_027102326	XM_027101324	XM_027127553		XM_027115048	XM_027115059
Lagenorhynchus albirostris	Cetartiodactyla								FJ455483
Tursiops truncatus	Cetartiodactyla	XM_019926425	XM_004312983	XM_004312984		XM_019923101	XM_004314725	XM_004314724
Lipotes vexillifer	Cetartiodactyla			XM_007466083		XM_007451089	XM_007451090	XM_007451084	XM_007451083
Stenella coeruleoalba	Cetartiodactyla								FJ455482
Odocoileus virginianus	Cetartiodactyla		XM_020880728					XM_020886146	XM_020886142
Bos taurus	Cetartiodactyla	NM_001105617		XM_010804332	XM_027539401	XM_002685288		NM_001205871	XM_024980084
Bos mutus	Cetartiodactyla							XM_005910403
Bos indicus	Cetartiodactyla					XM_019970413
Bubalus bubalis	Cetartiodactyla	XM_006066074	XM_025291264	XM_025291263	XM_006066084	XM_025274433	XM_006066092	XM_006066094	XM_006066100
Bison bison	Cetartiodactyla					XM_010859791		XM_010859792
Ovis aries	Cetartiodactyla	XM_004007941	XM_004007939	XM_015095335	XM_015108918	XM_027964819	XM_012143654	XM_012143651	XM_012143650
Capra hircus	Cetartiodactyla	XM_013963366	XM_018047091	XM_018047092	XM_005679360	XM_013968710			XM_013968277
Odocoileus virginianus	Cetartiodactyla	XM_020880729
Vicugna pacos	Cetartiodactyla	XM_006201834						XM_006204890
Sus scrofa	Cetartiodactyla	XM_003134838	JN836600	XM_003134850	XM_021078465	XM_013984297	XM_021076345	XM_021076048	XM_003483680
Camelus ferus	Cetartiodactyla							XM_006189921
Camelus bactrianus	Cetartiodactyla							XM_010960720
Vicugna pacos	Cetartiodactyla							XM_006204890
Ceratotherium simum	Perissodactyla	XM_004418890	XM_004418889	XM_004418888		XM_004426654	XM_004426655	XM_004426653	XM_004426650
Equus przewalskii	Perissodactyla						XM_008533045	XM_008533049
Equus caballus	Perissodactyla	XM_003364827	XM_005614755	XM_023639423	XM_023639422	XM_023622040	XM_023622039	XM_001500102	XM_014732278
Equus asinus	Perissodactyla	XM_014841026				XM_014834067	XM_014834066	XM_014834036	XM_014834102
Puma concolor	Carnivora		XM_025929860			XM_025935209	XM_025935027	XM_025935345
Acinonyx jubatus	Carnivora	XM_015085951	XM_027075165	XM_027075166		XM_027055438	XM_015086514	XM_027055442	XM_015087341
Arctonyx collaris	Carnivora								FJ455488
Felis catus	Carnivora	XM_003982882	XM_023250455	XM_023250456	XM_019825059	XM_019839123	XM_003990888	XM_011285399	XM_003990941
Panthera pardus	Carnivora	XM_019443673	XM_019443672	XM_019443674		XM_019460299	XM_019460286	XM_019460347	XR_002083048
Suricata suricatta	Carnivora	XM_029956145	XM_029956131	XM_029956118		XM_029932970		XM_029932973
Ursus arctos	Carnivora	XM_026508292	XM_026508285	XM_026508303	XM_026508326	XM_026492501	XM_026492500	XM_026490561	XM_026490566
Ursus maritimus	Carnivora	XM_008686436
Ailuropoda melanoleuca	Carnivora	XM_011223457
Canis lupus	Carnivora	XM_539489	XM_025464462	XM_025464463	XM_539492	XM_025460281	XM_025460280		XM_025460473
Vulpes vulpes	Carnivora	XM_025993335						XM_025994257
Enhydra lutris	Carnivora	XM_022503218	XM_022503229	XM_022503436	XM_022503463	XM_022498652	XM_022499580	XM_022501107	XM_022500287
Mustela putorius	Carnivora	XM_004762548	XM_004762547			XM_004774398	XM_004774397	XM_004774396	XM_004774395
Eumetopias jubatus	Carnivora	XM_028119333	XM_028119338	XM_028119251		XM_028125727	XM_028125457	XM_028121416	XM_028125742
Zalophus californianus	Carnivora	XM_027574148	XM_027574145	XM_027574146	XM_027574201	XM_027588961	XM_027588960	XM_027590897	XM_027590522
Odobenus rosmarus	Carnivora	XM_004397367	XM_004397366	XM_004397368		XM_004409012	XM_004409011	XM_004409010	XM_004409009
Callorhinus ursinus	Carnivora	XM_025873307	XM_025873308	XM_025873345		XM_025849788	XM_025849743	XM_025887666	XM_025887676
Leptonychotes weddellii	Carnivora	XM_006731529	XM_006731530	XM_006731531			XM_006739535	XM_006739536
Neomonachus schauinslandi	Carnivora	XM_021689555	XM_021689575	XM_021689774		XM_021703165	XM_021703156	XM_021703217	XM_021703201
Manis javanica	Pholidota	XM_017646488		XM_017646487		XM_017675307		XM_017675311
Pteropus vampyrus	Chiroptera	XM_011361697	XM_011361696	XM_011361698		XM_011357134	XM_011357150	XM_011357157
Pteropus alecto	Chiroptera							XM_006921226
Megaderma lyra	Chiroptera								FJ455492
Hipposideros armiger	Chiroptera	XM_019639966	XM_019639963	XM_019639964		XM_019630887		XM_019630891	XM_019630890
Phyllostomus discolor	Chiroptera		XM_028525587	XM_028525590	XM_028525629			XM_028510008	XM_028509252
Rousettus aegyptiacus	Chiroptera		XM_016135947	XM_016135911		XM_016135214	XM_016134650	XM_016135242	XM_016135255
Rousettus leschenaultii	Chiroptera								FJ455490
Desmodus rotundus	Chiroptera	XM_024563045					XM_024561571	XM_024561585
Miniopterus natalensis	Chiroptera							XM_016207940
Eptesicus fuscus	Chiroptera							XM_008138531
Taphozous melanopogon	Chiroptera								FJ455493
Myotis lucifugus	Chiroptera	XM_006088762					XM_006083088
Myotis davidii	Chiroptera						XM_006760592
Myotis brandtii,	Chiroptera						XM_005857609
Eptesicus fuscus	Chiroptera						XM_008138530
Condylura cristata	Eulipotyphla		XM_004676801	XM_004676803			XM_004674502	XM_004674503
Erinaceus europaeus	Eulipotyphla			XM_007526900					FJ455494
Sorex araneus	Eulipotyphla	XM_004604058					XM_004601178	XM_004601177
Fukomys damarensis	Rodentia						XM_010607051
Marmota flaviventris	Rodentia	XM_027939626	XM_027939624	XM_027939716	XM_027939720	XM_027946086		XM_027946001	XM_027946184
Marmota marmota	Rodentia	XM_015490173	XM_015490172	XM_015490355		XM_015478993		XM_015478991	XM_015478989
Urocitellus parryii	Rodentia	XM_026400252	XM_026400249	XM_026400251	XM_026400222	XM_026405644		XM_026405656	XM_026405657
Petaurista alborufus	Rodentia								FJ455495
Ictidomys tridecemlineatus	Rodentia	XM_005319145		XM_005319144		XM_005324630		XM_005324628
Heterocephalus glaber	Rodentia	XM_004839504	XM_004839506	XR_002393079		XM_021238593		XM_004857719	XM_004857718
Cavia porcellus	Rodentia	XM_003467964		XM_003467968		XM_023561090	XM_005373415
Chinchilla lanigera	Rodentia	XM_005377462		XM_013510674				XM_005373416
Rattus norvegicus	Rodentia			XM_008762951	NM_001271355	NM_001173469
Octodon degus	Rodentia	XM_004626492	XM_004626490	XM_004626493			XM_004634732	XM_004634733
Castor canadensis	Rodentia	XM_020179365	XM_020179363	XM_020179368		XM_020185003			XM_020184340
Dipodomys ordii	Rodentia	XM_013024493	XM_013024490	XM_013024416
Nannospalax galili	Rodentia	XM_008841509	XM_008841510	XM_008841512			XM_008855309	XM_008855307
Grammomys surdaster	Rodentia		XM_028790051	XM_028790083
Mus pahari	Rodentia			XM_021191317		XM_021194687
Mus musculus	Rodentia			NM_010450	NM_008264	NM_013555	XM_006498789
Mus caroli	Rodentia	XM_021164340		XM_021165606	XM_021165784	XM_021180933
Peromyscus maniculatus	Rodentia	XM_016000773	XM_006982208			XM_006972455	XM_006972454
Peromyscus leucopus	Rodentia		XM_028864141	XM_028864223		XM_028880577			XM_028880582
Cricetulus griseus	Rodentia	XM_003501985		XM_027429644		XM_027420148	XM_003498317
Meriones unguiculatus	Rodentia			XM_021632805	XM_021632811	XM_021650441
Microtus ochrogaster	Rodentia			XM_005366595
Mesocricetus auratus	Rodentia			XM_005085871		XM_005065140	XM_021232513		XM_005065143
Jaculus jaculus	Rodentia		XM_004652786	XM_004652785
Macaca mulatta	Primates	XM_001091402	XM_015133830		XM_002803358	XM_015110412			XM_028831389
Macaca fascicularis	Primates	XM_005549922	XM_005549923			XM_005573549	XM_015432386
Macaca nemestrina	Primates	XM_011731250	XM_011731249		XM_011731251	XM_011743889	XM_011743888		XM_011743894
Theropithecus gelada	Primates	XM_025380682	XM_025380680		XM_025379890	XM_025405310	XM_025404733	XM_025405472	XM_025405317
Mandrillus leucophaeus	Primates	XM_011972263	XM_011972264				XM_011991855	XM_011991856
Chlorocebus sabaeus	Primates	XM_007981817	XM_007981819		XM_007981795	XM_007965429	XM_007965426	XM_007965428	XM_007965425
Cercocebus atys	Primates	XM_012082303	XM_012082294			XM_012047070	XM_012047072	XM_012047069	XM_012047068
Carlito syrichta	Primates						XM_008061453	XM_008061444
Colobus angolensis	Primates	XM_011938589		XM_011938590			XM_011944013	XM_011944012
Piliocolobus tephrosceles	Primates	XM_023225942	XM_023225941	XM_023225918		XM_023212310			XM_023212300
Rhinopithecus roxellana	Primates	XM_010388310	XM_010388309	XM_010388311		XM_010382277		XM_010382261
Rhinopithecus bieti	Primates	XM_017881462	XM_017881461	XM_017881463		XM_017868307	XM_017868311	XM_017868313	XM_017868315
Pan troglodytes	Primates	XM_001162954	XM_016945573	XM_519012	XR_002944595	XM_016950081		XM_515926	XM_525967
Pan paniscus	Primates	XM_003807902					XM_003815541	XM_003815542
Homo sapiens	Primates	NM_152739	BC013971	NM_005523	NM_000522	NM_014213	NM_002148	NM_021193	NM_000523
Gorilla gorilla	Primates	XM_004045225	XM_019031804	XM_004045224		XM_004032833		XM_004032840
Papio anubis	Primates	NM_001168899				XM_003907650	XM_021923735	XM_003907649	XM_003907648
Pongo abelii	Primates	XM_003777073		XM_002818099	XM_024249904	XM_024243235		XM_002812607	XM_002812606
Nomascus leucogenys	Primates	XM_003270454		XM_003270453			XM_003253752	XM_003253751
Aotus nancymaae	Primates	XM_012447842	XM_012447840	XM_012447845		XM_012471905	XM_012471944		XR_001110517
Callithrix jacchus	Primates		XM_002751450	XM_003733569					XM_002749306
Saimiri boliviensis	Primates	XM_010345698	XM_003935154				XM_003921841
Microcebus murinus	Primates	XM_012773383	XM_012773381	XM_012773384			XM_012753434	XM_012753367	XM_012753446
Propithecus coquereli	Primates	XM_012640741	XM_012640740	XM_012640700		XM_012650733	XM_012650719		XM_012650740
Otolemur garnettii	Primates	XM_023514154	XM_003788528	XM_003788530		XM_003791493	XM_003791495		XM_003791497
Cebus capucinus	Primates		XM_017527049	XM_017527052	XM_017527053	XM_017538275			XM_017538284
Tupaia chinensis	Scandentia						XM_006151104	XM_006151106
Galeopterus variegatus	Dermoptera	XM_008573720
Dasypus novemcinctus	Dasypodidae						XM_004476818		XM_004476896
Ochotona princeps	Lagomorpha		XM_004582419			XM_004577032
Oryctolagus cuniculus	Lagomorpha		XM_002713729	NM_001171404					FJ455496
Trichechus manatus	Afrotheria	XM_004377482		XM_004377483				XM_004375484
Loxodonta africana	Afrotheria	XM_003407056		XM_003407054					XM_003406208
Orycteropus afer	Afrotheria	XM_007945646	XM_007945634	XM_007945626
Elephantulus edwardii	Afrotheria			XM_006896115
Chrysochloris asiatica	Afrotheria	XM_006832189	XM_006832188	XM_006832187	XM_006832186	XM_006866667			XM_006866665
Echinops telfairi	Afrotheria			XM_004702740
